# Supplementary material for: Protective Effects of Lactoferrin against SARS-CoV-2 Infection In Vitro
Source: MDPI journal article supplement (doi:10.3390/nu13020328), 2021-01-23
Supplement: s1 [file s1]

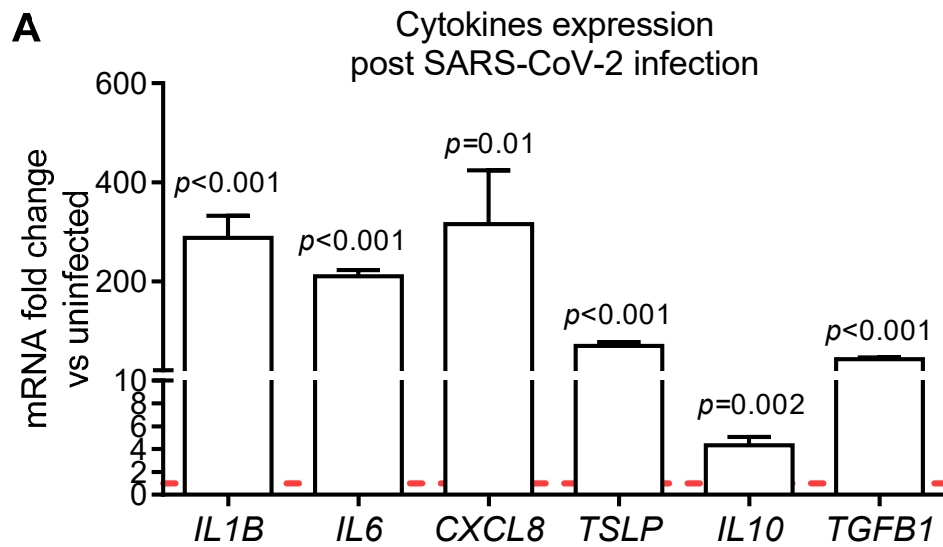

**Scheme 1. Modulation of cytokine expression by SARS-CoV-2 infection *in vitro*.** (A) Caco-2 cells were infected with SARS-CoV-2. Cytokines expression was assessed by real-time qPCR 24 hours post infection (n=3-6). Data are shown as relative fold changes compared to uninfected control (not shown, arbitrarily set as 1) and presented as mean + standard error of the mean.
